# Supplementary material for: PredCRP: predicting and analysing the regulatory roles of CRP from its binding sites in Escherichia coli
Source: PubMed Central journal article supplement (PMC5772556; doi:10.1038/s41598-017-18648-5), 2018-01-17
Supplement: 41598_2017_18648_MOESM1_ESM.pdf [file 41598_2017_18648_MOESM1_ESM.pdf]

## ***Supporting information***

# **PredCRP: predicting and analysing the regulatory roles of CRP from its binding sites in *Escherichia coli***

**Ming-Ju Tsai<sup>1</sup>, Jyun-Rong Wang<sup>1</sup>, Chi-Dung Yang<sup>2,3</sup>, Kuo-Ching Kao<sup>1</sup>, Wen-Lin Huang<sup>4</sup>, Hsi-Yuan Huang<sup>5</sup>, Ching-Ping Tseng<sup>2</sup>, Hsien-Da Huang<sup>1,2</sup>, and Shinn-Ying Ho<sup>1,2\*</sup>**

<sup>1</sup>Institute of Bioinformatics and Systems Biology, National Chiao Tung University, Hsinchu, Taiwan

<sup>2</sup>Department of Biological Science and Technology, National Chiao Tung University, Hsinchu, Taiwan

<sup>3</sup>Institute of Population Health Sciences, National Health Research Institutes, Miaoli, Taiwan

<sup>4</sup>Department and Institute of Industrial Engineering and Management, Minghsin University of Science and Technology, Hsinchu, Taiwan

<sup>5</sup>Department of Laboratory Medicine, China Medical University Hospital, Taichung, Taiwan

\*Corresponding author

Email address:

SYH: [syho@mail.nctu.edu.tw](mailto:syho@mail.nctu.edu.tw)

# Materials and Methods

## Datasets of CRP-binding sites

### A survey of the 23 putative CRP-binding sites

The DNA sequence, -NNNTG<sub>5</sub>TG<sub>7</sub>ANNNNNNTC<sub>16</sub>AC<sub>18</sub>ANNN-, a well-known palindromic sequence, is bound by CRP<sup>1-3</sup>. (a G to C mutation at position 5 and a C to G mutation at position 16) reduced CRP-binding ability significantly and used as the negative control in normal EMSA experiments<sup>4,5</sup>. Careful observation of all of the 23 putative CRP-binding sites on promoter regions which we used in this study reveals that all DNA sequences four matched base on the G<sub>5</sub>, G<sub>7</sub>, C<sub>16</sub> and C<sub>18</sub> at the palindromic sequence, except the CRP consensus sequence on the *ycdZ* promoter, which have one mutation on C<sub>18</sub> change to T<sub>18</sub>. Based on the above reasons, the experiment results of EMSA and the related references from the EcoCyc database<sup>6</sup> listed in Table S1, we can conclude and generalize that 23 putative CRP-binding sites are CRP-binding sites.

## Feature extraction of the CRP-binding sites

### Composition descriptor

The composition of 4-mer motifs was calculated based on the number of all 4-mer motifs (i.e. from AAAA to TTTT), which may be related to the codon usage of polymerase<sup>7</sup>. The number of all 4-mer motifs were calculated using the following formula.

$$N_{4-mer} = \left( \frac{N_{AAAA}}{L}, \frac{N_{AAAC}}{L}, \dots, \frac{N_{TTTT}}{L} \right) \quad (1)$$

In equation (1),  $L$  is the length of the binding site sequence and the  $N_{AAAA}$  to  $N_{TTTT}$  are defined as the occurrence frequency of a specific 4-mer in a given binding site sequence. Similarly, The composition of 3-mer was calculated using the following formula.

$$N_{3-mer} = \left( \frac{N_{AAA}}{L}, \frac{N_{AAC}}{L}, \dots, \frac{N_{TTT}}{L} \right) \quad (2)$$

## Location-dependent descriptor

Although the regulatory roles of CRP have been previously examined <sup>8</sup>, few quantitative studies have been conducted. For instance, the distribution of transcription factor (TF)-binding site locations for activators and repressors has been examined in studies characterising the roles of regulation of TFs in *E. coli*. However, the accuracy of predicting each TF using the distribution of TF binding site locations has not been reported. In this work, the 17 features from the location-dependent location descriptor were integrated to predict the regulation mode of CRP in *E. coli*. The novel location descriptor include location-dependent knowledge such as the operator centre position of the CRP-binding site, the size of the overlap regions between a CRP-binding site to the regions of specific mechanisms (Table S3). However, these sequence descriptors have not been reported previously for predicting the regulation roles of TFs in *E. coli*.

## Physicochemical property descriptor

For a given DNA sequence, the 3 DNA physicochemical properties represent the average absorption maxima, molecular weight, and molar absorption coefficient of the given sequence, respectively <sup>9</sup>.

## Global sequence descriptor

The global sequence descriptor of promoter/non-promoter sequences contains four parts, entropy density profile (EDP), single nucleotide composition, transition, and DNA nucleotide distribution <sup>10</sup>. The EDP model is a globally statistical descriptor of DNA sequences based on Shannon's artificial linguistic description for a DNA sequence of finite length <sup>11</sup>. Six EDP descriptors, including  $EDP_{EQ}$ ,  $EDP_{EH}$ , and  $EDP_{Ei}$  ( $EDP_{EA}$ ,  $EDP_{EC}$ ,  $EDP_{EG}$ , and  $EDP_{ET}$ ) are defined as follows:

$$EDP_{EQ} = q_A^2 + q_C^2 + q_G^2 + q_T^2 \quad (3)$$

$$EDP_{EH} = - \sum_i q_i \log q_i \quad (4)$$

$$EDP_{E_i} = \frac{-1}{EDP_{EH}} q_i \log q_i \quad (5)$$

In these formulas,  $EDP_{EQ}$  and  $EDP_{E_i}$  are statistical quantities,  $q_i$  is the single nucleotide composition,  $i$  is the index that specifies the nucleotides (A, C, G, and T), and  $EDP_{EH}$  is Shannon's entropy. Additionally, the  $q_i$  of four nucleotides (A, C, G, and T) is also included in the global sequence descriptor.

Features of the transition descriptor,  $T(\alpha, \beta)$ , are used to characterise the percent frequency with which  $\alpha$  is followed by  $\beta$  or  $\beta$  is followed by  $\alpha$ , where  $\alpha$  is not equal to  $\beta$ . The six transition frequencies include  $T(A, C)$ ,  $T(A, G)$ ,  $T(A, T)$ ,  $T(C, G)$ ,  $T(C, T)$ , and  $T(G, T)$ . For example, for the S20 sequence, there are four transitions of type  $T(A, C)$ , **CATAGCCATTGCATGACCCG**; the letters shown in bold indicate that the value of CRP  $T(A, C)$  is 21.05 % (4/19).

The final part of the global sequence descriptor is the locations of a certain nucleotide (A, C, G, and T) in  $n$ -th segments of a given sequence divided by the length of the given sequence. In this work,  $n = 5$  was used. For example, the S20 sequence, **CATAGCCATTGCATGACCCG**, The nucleotide "A" is shown at the positions 2, 4, 8, 13, and 16. Hence, the features of first A, second A, third A, fourth A and fifth A have values of 10% (2/20), 20% (4/20), 40% (8/20), 65% (13/20), and 80% (16/20), respectively.

## Feature selection in cooperation with an SVM

- Step 1: Each sample is represented as an  $n$ -dimensional feature vector  $p = [p_1, p_2, \dots, p_n]$  In this work,  $n = 380$  was used.
- Step 2: Each IBCGA-chromosome consists of binary genes  $f_i$  from which to select 380 features and two 4-bit genes for encoding the kernel parameter  $\gamma$  and the cost parameter ( $C$ ). The corresponding feature  $p_i$  (the  $i$ -th feature) is excluded from the SVM classifier if  $f_i = 0$ , and  $p_i$  is included if  $f_i = 1$ . Let  $m$  be the sum of  $f_i$ . The  $\gamma > 0$  determines how the samples are transformed into a

high-dimensional search space. The cost parameter  $C > 0$  of the SVM classifier adjusts the penalty of total error. These two parameters  $C$  and  $\gamma$  must be tuned to obtain the best prediction performance. In this work,  $\gamma \in \{2^{-8}, 2^{-7}, \dots, 2^7\}$  and  $C \in \{2^{-8}, 2^{-7}, \dots, 2^7\}$

- Step 3: The fitness function is the prediction accuracy of k-fold cross-validation using the LIBSVM classifier<sup>12</sup> with the  $m$  selected informative features and the SVM parameters ( $\gamma$  and  $C$ ) by decoding the IBCGA-chromosome. In this study, a popular kernel function which is a radial basis function  $\exp(-\gamma ||x^i - x^j||^2)$  was adopted.  $x^i$  and  $x^j$  were training samples and  $\gamma$  was a kernel parameter. The parameter settings of IBCGA are shown in Table S4. In this study,  $k = 24$  was used.
- Step 4: All solutions for  $S_r$  from  $r = r_{start}$  to  $r_{end}$  are obtained using IBCGA. Let  $S_m$  be the most accurate solution with  $m$  selected features among all solutions from  $C(n, r_{start})$  to  $C(n, r_{end})$  search space. In this study,  $r_{start} = 10$  and  $r_{end} = 40$  were used.
- Step 5: IBCGA use mechanisms of randomisation and are therefore characterised as non-deterministic because the results of individual runs are not always the same. Therefore, Steps 3 and 4 are performed for  $R$  independent runs to obtain the best  $R$  number of discrete runs to obtain the best  $R$  solutions. In this study,  $R = 30$  was used.

## Inference process of interpretable rules

Let  $l$  and  $r$  be the left end (the start position of CRP-binding site) and the right end (the end position of CRP-binding site) of a given CRP-binding site. Since the length of a CRP-binding site is 22, there exists the following equations. The nodes of the decision tree are numbering in both top-to-down and left-to-right manners (Figure S8).

$$l + 21 = r \quad (6)$$

$$r - 21 = l \quad (7)$$

### Activation rule 1

step1: IF (Node1 is equal to 0) THEN ( $r < -10$  OR  $l > 2$ )

Step2: SINCE ( $r < -10$ ) THEN ( $l + 21 < -10$ )

Step3: SINCE ( $l + 21 < -10$ ) THEN ( $l < -31$ )

Step4:HENCE, IF (Node1 is equal to 0) THEN ( $l < -31$  OR  $l > 2$ )

Step5: IF (Node 3  $\leq 11.5$ ) THEN ( $(r - 10.5 \leq -60)$  OR  $(l + 10.5 \geq 60)$ )

Step6: SINCE ( $r - 10.5 \leq -60$ ) THEN ( $l + 21 \leq -49.5$ )

Step7: SINCE ( $l + 21 \leq -49.5$ ) THEN ( $l \leq -70.5$ )

Step8: HENCE, IF (Node 3  $\leq 11.5$ ) THEN ( $l \leq -70.5$  OR  $l \geq 49.5$ )

Step9: IF ((Node1 is equal to 0) AND (Node 3  $\leq 11.5$ ) AND (the TTTT composition  $\leq 2$ )) THEN (a given CRP-binding site tends to be an activator)

Activation rule 1 states that if a given CRP-binding site satisfy ( $l \leq -70.5$  OR  $l \geq 49.5$ ) AND (the TTTT composition  $\leq 2$ )) then it tends to be an activator.  $l \leq -70.5$  is equivalent to  $r \leq -49.5$ . The inference process of the location criteria is shown in Figure S2.

## **Activation rule 2**

Step1: IF (Node1 is equal to 0) THEN ( $r < -10$  OR  $l > 2$ )

Step2: SINCE ( $r < -10$ ) THEN ( $l + 21 < -10$ )

Step3: HENCE, IF (Node1 is equal to 0) THEN ( $l < -31$  OR  $l > 2$ )

Step4: IF (Node3  $> 11.5$ ) THEN ( $(r - 10.5 > -60)$  OR  $(l + 10.5 < 60)$ )

Step5: SINCE ( $r - 10.5 > -60$ ) THEN ( $r > -49.5$ )

Step6: SINCE ( $r > -49.5$ ) THEN ( $l + 21 > -49.5$ )

Step7: SINCE ( $l + 21 > -49.5$ ) THEN ( $l > -70.5$ )

Step8: HENCE, IF (Node3  $> 11.5$ ) THEN ( $l > -70.5$  OR  $l < 49.5$ )

Step9: IF (Node5  $> 15.5$ ) THEN ( $(r - 14.5 > -95)$  AND  $(l + 14.5 < -35)$ )

Step10: SINCE ( $r - 14.5 > -95$ ) THEN ( $l + 21 > -80.5$ )

Step11: SINCE ( $l + 21 > -80.5$ ) THEN ( $l > -101.5$ )

Step12: HENCE, IF (Node5 > 15.5) THEN ( $-101.5 < l < -49.5$ )

Step13: IF ((Node1 is equal to 0) AND (Node3 > 11.5) AND (Node5 > 15.5)) THEN ( $-70.5 < l < -49.5$ )

Step14: SINCE ( $l < -49.5$ ) THEN ( $r - 21 < -49.5$ )

Step15: SINCE ( $r - 21 < -49.5$ ) THEN ( $r < -28.5$ )

Step16: IF ((Node1 is equal to 0) AND (Node3 > 11.5) AND (Node5 > 15.5) AND (the AACG composition is equal to 0)) THEN (a given CRP-binding site tends to be an activator)

Activation rule 2 states that if a given CRP-binding site satisfy ( $-70.5 < l < -49.5$ ) AND (the AACG composition is equal to 0)) then it tends to be an activator. ( $-70.5 < l < -49.5$ ) is equivalent to  $-70.5 < region < -28.5$ . The inference process of the location criteria is shown in Figure S3.

## Repression rule 1

Step1: IF (Node1 is equal to 0) THEN ( $r < -10$  OR  $l > 2$ )

Step2: SINCE ( $r < -10$ ) THEN ( $l + 21 < -10$ )

Step3: SINCE ( $l + 21 < -10$ ) THEN ( $l < -31$ )

Step4: HENCE, IF (Node1 is equal to 0) THEN ( $l < -31$  OR  $l > 2$ )

Step5: IF (Node 3 > 11.5) THEN ( $(r - 10.5 > -60)$  OR ( $l + 10.5 < 60$ ))

Step6: SINCE ( $r - 10.5 > -60$ ) THEN ( $r > -49.5$ )

Step7: SINCE ( $r > -49.5$ ) THEN ( $l + 21 > -49.5$ )

Step8: SINCE ( $l + 21 > -49.5$ ) THEN ( $l > -70.5$ )

Step9: HENCE, IF (Node 3 > 11.5) THEN ( $(l > -70.5)$  OR ( $l < 49.5$ ))

Step10: IF (Node5 <= 15.5) THEN ( $(r - 14.5 <= -95)$  OR ( $l + 14.5 >= -35$ ))

Step11: SINCE ( $r - 14.5 <= -95$ ) THEN ( $r <= -80.5$ )

Step12: SINCE ( $r <= -80.5$ ) THEN ( $l + 21 <= -80.5$ )

Step13: HENCE, IF (Node5  $\leq$  15.5) THEN( $l \leq -101.5$  OR  $l \geq -49.5$ )

Step10: IF ((Node1 is equal to 0) AND (Node 3  $>$  11.5) AND (Node5  $\leq$  15.5) AND (the TTAC composition is equal to 0))

THEN (a given CRP-binding site tends to be a repressor)

Repression rule 1 states that if a given CRP-binding site satisfy ( $(-49.5 \leq l < -31)$  OR  $(2 < l < 49.5)$ )AND (the TTAC composition is equal to 0)) then it tends to be a repressor.  $(-49.5 \leq l < -31)$  is equivalent to  $-49.5 \leq region < -10$ .  $2 < l < 49.5$  is equivalent to

$2 < region < 70.5$ . The inference process of the location criteria is shown in Figure S4.

## Repression rule 2

Step1: IF (Node1 is equal to 0) THEN ( $(r > -10)$  OR  $(l < 2)$ )

Step2: SINCE  $(r > -10)$  THEN  $(l + 21 > -10)$

Step3: SINCE (Step1 AND Step2) THEN  $(-31 < l < 2)$

Step4: SINCE  $(l < 2)$  THEN  $(r - 21 < 2)$

Step5: SINCE  $(r - 21 < 2)$  THEN  $(r < 23)$

Step6: IF (Node1 is equal to 0 AND (the GAGC composition is equal to 0) AND (the TTAC composition is equal to 0)) THEN (a given CRP binding site tends to be a repressor)

Repression rule 2 states that if a given CRP-binding site satisfy ( $(-31 < l < 2)$  AND (the GAGC composition is equal to 0) AND (the TTAC composition is equal to 0)) then it tends to be a repressor.  $(-31 < l < 2)$  is equivalent to  $-31 < region < 23$ . The inference process of the location criteria is shown in Figure S5.

## Inference of relative quantity in real-time qPCR



In this study, To determine the regulatory roles of the studied sequence, a relative method can be used, where *16S* rRNA gene is a calibrator. First, internal control for each gene, difference between  $\Delta$ Ct of studied gene and control gene (*16S*) is calculated, then subtract between (so the value of the “ $\Delta\Delta$ Ct”)  $\Delta$ Ct of sample with 1mM and  $\Delta$ Ct of the calibrator (0mM). Normalized value of the expression level relative to the calibrator is determined by the formula <sup>13</sup>: Relative quantity =  $2^{-\Delta\Delta Ct}$ . The results of qPCR experiment are shown in Table S2.

## Supplementary Tables

**Table S1.** Analysis of the crucial binding positions of the 23 putative CRP-binding sites

| 10bp + CRP binding sites + 10bp                       | CRP-regulated gene         | Reference |
|-------------------------------------------------------|----------------------------|-----------|
| gttatctataTTAT <b>GTG</b> ATCTAAATCACTTTTaaagtcagagt  | <i>aaeR</i>                | 14        |
| caaaggcaaaaAAAT <b>GTG</b> ATTTTCGTACACATCTgatttcactg | <i>ldiB</i>                | 15        |
| cagtgaatcAGAT <b>GTG</b> TACGAAATCACATTTtttgcccttg    | <i>ybiT</i>                | 14,15     |
| ttggtgcataAAAT <b>GTG</b> TGCTCGATCTCATTcatggccgcgt   | <i>ycdZ</i>                | 16        |
| aacaattttcTGAC <b>GTG</b> ATCTTCATCACAAATaatgacagtt   | <i>idnDOTR</i>             | 17        |
| actctgacttAAA <b>AGT</b> GATTTAGATCACATAatagataac     | <i>aaeXAB</i>              | 14        |
| gtaatcccaaAGCG <b>GTG</b> ATCTATTTCAAATtaataattaa     | <i>aspA-dcuA</i>           | 18,19     |
| cccgaacaaaAAAT <b>GTG</b> ATACCAATCACAGAAacagcttat    | <i>caiTABCDE</i>           | 20-22     |
| atattcccacATTT <b>GTG</b> ATGGCTCTCACCTTTtaaagtgtga   | <i>exuT</i>                | 23        |
| gcgattacacTGAT <b>GTG</b> ATTTGCTTCACATCTttttacgtcg   | <i>galP</i>                | 24        |
| caatctccgcGAG <b>CGT</b> GCCAGTTTTCACATTCctcagttgca   | <i>grpE</i>                | 15        |
| atactcactTCT <b>CGT</b> GATCAAGATCACATTctcgctttccc    | <i>hyfABCDEFGHIJR-focB</i> | 25        |
| tttttcacaaaATTT <b>GAG</b> AGTTGAATCTCAAATcatatcaaaa  | <i>malS</i>                | 26,27     |
| aaagcccgaaaAAAT <b>GTG</b> CTGTTAATCACATGCetaagtaaaa  | <i>mlc</i>                 | 28        |
| gacgtcattaTAGT <b>GTG</b> TGTCAGATCTCGTTTTccttaacca   | <i>nupC</i>                | 15,29,30  |
| aaccgcagctATTT <b>GTG</b> AATCTTTTCACAGTTtaaattcccc   | <i>preTA</i>               | 31        |
| aaaatgcccgAGAT <b>GTG</b> AAGCAAATCACCCACTtaatgccgt   | <i>rhaT</i>                | 15,32     |
| taaatgttgtTAT <b>CGT</b> GACCTGGATCACTGTTcaggataaaa   | <i>sdhCDAB-sucABCD</i>     | 15,33     |
| actggtcgtaTGC <b>GTG</b> ACGGAGTTCACCCTTtacgcctcct    | <i>sfsA-dksA</i>           | 34        |
| acggcattaaGTGG <b>GTG</b> ATTTGCTTCACATCTcgggcatttt   | <i>sodA</i>                | 15        |
| ttttaagatTAAT <b>GCG</b> ATCTATATCACGCTGtgggtattgc    | <i>uidABC</i>              | 35        |
| ttccattttaTTTT <b>GCG</b> AGCGAGCGCACACTTgtgaattatc   | <i>xylAB</i>               | 36        |
| gataattcacAAGT <b>GTG</b> CGCTCGCTCGCAAAAataaatggaa   | <i>xylFGHR</i>             | 36        |

The G<sub>5</sub>, G<sub>7</sub>, C<sub>16</sub> and C<sub>18</sub> are highlighted in bold.

**Table S2.** The results of real-time qPCR experiments.

| <i>Gene</i> | 0mM  |      | 1mM  |      | 0mM           |      | 1mM           |      | $\Delta\Delta Ct$ |      | RQ*  |      | AVG  | Roles* |
|-------------|------|------|------|------|---------------|------|---------------|------|-------------------|------|------|------|------|--------|
|             | R1*  | R2*  | R1   | R2   | $(\Delta Ct)$ |      | $(\Delta Ct)$ |      | R1                | R2   | R1   | R2   |      |        |
|             |      |      |      |      | R1            | R2   | R1            | R2   |                   |      |      |      | RQ   |        |
| <i>l6s</i>  | 10.3 | 10.6 | 10.2 | 10.2 | -             | -    | -             | -    | -                 | -    | -    | -    | -    | -      |
| <i>aaeR</i> | 30.4 | 29.6 | 32.3 | 31.7 | 20.1          | 19.0 | 22.1          | 21.5 | 2.1               | 2.6  | 0.2  | 0.2  | 0.2  | R      |
| <i>aaeX</i> | 27.4 | 28.0 | 25.4 | 26.2 | 17.1          | 17.4 | 15.2          | 16.0 | -2.0              | -1.4 | 3.9  | 2.7  | 3.3  | A      |
| <i>aspA</i> | 25.6 | 24.2 | 22.4 | 22.4 | 15.3          | 13.6 | 12.2          | 12.2 | -3.2              | -1.4 | 8.9  | 2.6  | 5.8  | A      |
| <i>caiT</i> | 29.0 | 28.6 | 25.6 | 25.4 | 18.7          | 18.0 | 15.4          | 15.2 | -3.3              | -2.7 | 10.1 | 6.6  | 8.4  | A      |
| <i>exuT</i> | 24.5 | 24.5 | 21.2 | 21.0 | 14.2          | 13.9 | 11.0          | 10.8 | -3.3              | -3.1 | 9.6  | 8.8  | 9.2  | A      |
| <i>galP</i> | 27.5 | 29.0 | 25.5 | 25.7 | 17.2          | 18.3 | 15.3          | 15.5 | -1.9              | -2.8 | 3.7  | 7.2  | 5.4  | A      |
| <i>grpE</i> | 23.4 | 23.6 | 22.1 | 21.5 | 13.1          | 12.9 | 11.9          | 11.3 | -1.2              | -1.6 | 2.3  | 3.1  | 2.7  | A      |
| <i>hyfA</i> | 30.0 | 29.9 | 27.4 | 27.6 | 19.7          | 19.3 | 17.2          | 17.4 | -2.5              | -1.9 | 5.5  | 3.8  | 4.7  | A      |
| <i>idnD</i> | 20.5 | 20.6 | 18.2 | 18.6 | 10.3          | 10.0 | 7.9           | 8.4  | -2.3              | -1.6 | 5.0  | 3.0  | 4.0  | A      |
| <i>ldtB</i> | 26.9 | 26.5 | 29.1 | 29.2 | 16.6          | 15.9 | 18.9          | 19.0 | 2.3               | 3.1  | 0.2  | 0.1  | 0.2  | R      |
| <i>malS</i> | 29.9 | 30.5 | 27.0 | 26.0 | 19.6          | 19.9 | 16.8          | 15.9 | -2.8              | -4.0 | 6.9  | 16.3 | 11.6 | A      |
| <i>mlc</i>  | 32.4 | 31.9 | 27.0 | 27.3 | 22.2          | 21.2 | 16.8          | 17.1 | -5.4              | -4.2 | 41.9 | 18.0 | 30.0 | A      |
| <i>nupC</i> | 25.9 | 25.1 | 23.5 | 23.4 | 15.6          | 14.4 | 13.3          | 13.2 | -2.3              | -1.2 | 4.8  | 2.4  | 3.6  | A      |
| <i>preT</i> | 20.8 | 19.5 | 17.9 | 17.9 | 10.5          | 8.9  | 7.7           | 7.7  | -2.8              | -1.2 | 7.1  | 2.3  | 4.7  | A      |
| <i>rhaT</i> | 24.3 | 24.1 | 21.0 | 23.0 | 14.0          | 13.5 | 10.8          | 12.8 | -3.2              | -0.7 | 9.3  | 1.6  | 5.5  | A      |
| <i>sdhC</i> | 21.3 | 19.9 | 16.6 | 15.8 | 11.0          | 9.2  | 6.4           | 5.6  | -4.6              | -3.7 | 24.6 | 12.7 | 18.7 | A      |
| <i>sfsA</i> | 18.6 | 18.2 | 17.4 | 17.2 | 8.3           | 7.6  | 7.2           | 7.0  | -1.1              | -0.6 | 2.2  | 1.5  | 1.8  | A      |
| <i>sodA</i> | 17.3 | 16.0 | 17.2 | 15.1 | 7.0           | 5.4  | 7.0           | 4.9  | 0.1               | -0.5 | 1.0  | 1.4  | 1.2  | A      |
| <i>uidA</i> | 22.0 | 23.8 | 19.6 | 21.6 | 11.7          | 13.2 | 9.4           | 11.4 | -2.3              | -1.8 | 5.0  | 3.5  | 4.3  | A      |
| <i>xylA</i> | 24.0 | 24.1 | 22.7 | 21.3 | 13.7          | 13.5 | 12.4          | 11.1 | -1.2              | -2.5 | 2.4  | 5.5  | 3.9  | A      |
| <i>xylF</i> | 23.6 | 21.5 | 19.3 | 18.6 | 13.3          | 10.9 | 9.0           | 8.4  | -4.2              | -2.5 | 18.8 | 5.7  | 12.2 | A      |
| <i>ybiT</i> | 20.1 | 20.4 | 23.2 | 23.6 | 9.8           | 9.7  | 12.9          | 13.4 | 3.2               | 3.6  | 0.1  | 0.1  | 0.1  | R      |
| <i>ycdZ</i> | 19.1 | 19.2 | 24.1 | 24.2 | 8.8           | 8.5  | 13.9          | 14.1 | 5.0               | 5.5  | 0.0  | 0.0  | 0.0  | R      |

Roles, A stands for activation, and R stands for repression; RQ: Relative quantity; R1: Replicate 1; R2: Replicate 2

**Table S3.** The location-dependent descriptors from literature review

| Index | Location Description                                                                                                                                                                                   |
|-------|--------------------------------------------------------------------------------------------------------------------------------------------------------------------------------------------------------|
| L1    | The CRP-binding site located on the regions of upstream or downstream to the transcription start site.                                                                                                 |
| L2    | Distance from the centre position of the CRP-binding site to the transcription start site                                                                                                              |
| L3    | The size of the overlap region between the CRP-binding site and the region from -35 to -10.                                                                                                            |
| L4    | Distance between the CRP-binding site to the region from -35 to -10.                                                                                                                                   |
| L5    | The CRP binding site located on upstream or downstream to the region from -35 to -10. The upstream is defined as the region lower than -35 and the downstream is defined as the region larger than -10 |
| L6    | The size of the overlap region between the CRP-binding site and the region from -10 to 2. This                                                                                                         |

|     |                                                                                                                                                                                                                                                   |
|-----|---------------------------------------------------------------------------------------------------------------------------------------------------------------------------------------------------------------------------------------------------|
|     | feature may involve in the transcription bubble mechanism.                                                                                                                                                                                        |
| L7  | The size of the overlap region between the CRP-binding site and other repressor binding sites                                                                                                                                                     |
| L8  | The size of the overlap region between the CRP-binding site and other activator binding sites                                                                                                                                                     |
| L9  | The CRP binding site located on forward strand or reverse strand                                                                                                                                                                                  |
| L10 | The size of the overlap region between the CRP-binding site and the region from -95 to -60. This feature is consistent with the Class I rule.                                                                                                     |
| L11 | Thes size of the overlap region between the CRP-binding site and the region from -50 to 35. This feature is consistent with the Class II rule.                                                                                                    |
| L12 | The size of the overlap region between the CRP-binding site and the region from -60 to 60. This feature may involve in the three mechanisms, 1) activation by DNA conformation change, 2) repression by DNA looping and 3) cooperative repression |
| L13 | The size of overlap region between the CRP-binding site and the region from position -10 to 60. This feature may involve in the repression by roadblock mechanism.                                                                                |
| L14 | The size of the overlap region between the CRP-binding site and the region from -95 to -10. This feature may involve the repression by activator modulation mechanism                                                                             |
| L15 | The size of the overlap region between the CRP-binding site and the region from -95 to -35. This feature may involve in the cooperative activation mechanism.                                                                                     |
| L16 | The size of the overlap region between the CRP-binding site and the region from -10 to 10. This feature may involve in the promoter escape regulation mechanism.                                                                                  |
| L17 | The number of escaped promoters.                                                                                                                                                                                                                  |

---

Transcription start site denotes +1;

**Table S4.** The used control parameters of IBCGA

| <b>Parameter</b>                     | <b>Value</b> |
|--------------------------------------|--------------|
| Population size $N_{\text{pop}}$     | 50           |
| Selection probability $p_s$          | 0.2          |
| Crossover probability $p_c$          | 0.8          |
| Mutation probability $p_m$           | 0.05         |
| Factor number of orthogonal arrays   | 7            |
| Maximum generations $G_{\text{max}}$ | 60           |

**Table S5.** The used DNA primers for the quantitative PCR experiments

| <b>Gene</b> | <b>Reverse Sequence</b> | <b>Forward sequence</b>  |
|-------------|-------------------------|--------------------------|
| <i>aaeR</i> | CAGCTCCCCACGATTGATCT    | GACTCGCCTGATCCCACAAG     |
| <i>aaeX</i> | AGCAATAGAGCGCGGTGTTG    | GTGGTGTGTTGGGCTGTCCTT    |
| <i>aspA</i> | TTAGCAGTGATGCCGTTAATGC  | CACTGTTACCATGGCAGCAGAA   |
| <i>caiT</i> | AACACCCAACCCAGCATCAG    | CCTGCAACTGGACGCTATCA     |
| <i>hyfA</i> | ACATATTGCGCATGGGCATT    | GATGCGATCCAACTCAACGA     |
| <i>idnD</i> | ATGGGTCCAACACCGGAAAT    | ATGGCTTTTGCCGAACCTTT     |
| <i>ldtB</i> | TTGGCACAATTTCTTGACCTT   | GACGGCAGCCGTTATATTGAAG   |
| <i>malS</i> | CGTTCACCCAGCGATTTTTTT   | ATGAACCACACCGGCTATGC     |
| <i>mlc</i>  | CCTGCAACAGACGAATCAACA   | GTCAGCACATCAGCGTTGAGA    |
| <i>nupC</i> | CATGTATGCACCAACGATGGA   | CGGCAAAATCTCCCGTAATC     |
| <i>preT</i> | AATTTTATCTGCCGCCATCGT   | TCGATGGATTACGCCAGTA      |
| <i>rhaT</i> | ACAGTGGATCGACGCCAAGT    | GGTGATGTGCGGCATTTTCT     |
| <i>sdhC</i> | GATTTTGGCGGAGCGTTTAC    | AGGTATTCGCCACATGATGATG   |
| <i>sfsA</i> | CTACCCCTCTGTTGAGCTT     | CAGCGTGCGGTTATCTTTTTTC   |
| <i>sodA</i> | GCTGCTTCGTCCCAGTTCAC    | CGATTATGGGCCTGGATGTG     |
| <i>uidA</i> | GCACCATCAGCACGTTATCG    | GCAGTGAAGGGCGAACAGTT     |
| <i>xylA</i> | GATGCACCGGAGACAAATGA    | TGAAGATGGCGAGCTGGATAA    |
| <i>xylF</i> | GTGTTTCTTCATTGCCATTTGC  | CTGCACACGCCAAAGAAGTC     |
| <i>ybiT</i> | CCGCCGAGGATCTTCATAAA    | GTTCCGGCAGTAAGCCGTTGT    |
| <i>ycdZ</i> | GCAGCTGTTTGGCCTGAATAC   | CCACATCTGGAAATTCTCGGTTAT |
| <i>tnaA</i> | GGGTTCTGCACTCGGTGTACA   | CCGCGAAACCTACAAATATGC    |
| <i>exuT</i> | TGCATTACGATTGCCCATACC   | AAAGCCAGCTCCGAATGGTT     |
| <i>grpE</i> | GTTACCTGGCGCAACGTCAT    | TGCGTAAGTTTGGCGTTGAA     |

## Supplementary Figures

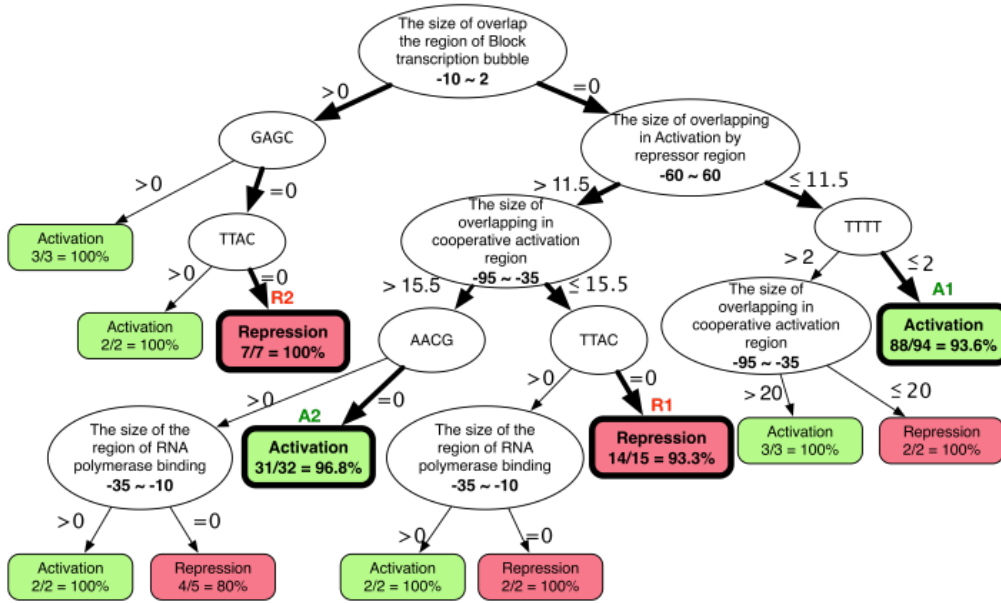

Figure S1. The decision tree was established using 12 informative features. This decision tree is pruned using the confidence level 25%. The four prediction rules with a high cover rate of CRPS were selected. These corresponding paths are highlighted with thick lines.

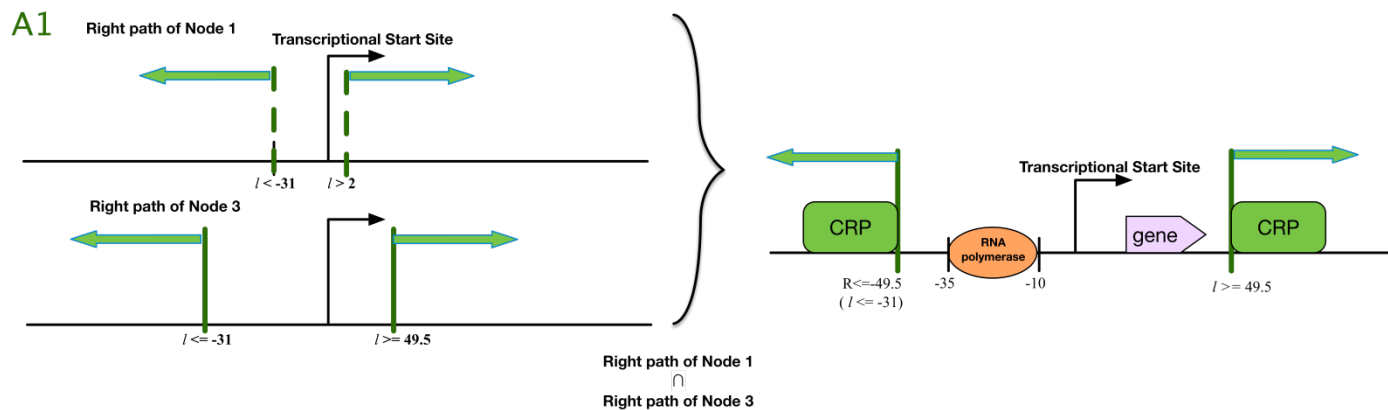

**Figure S2.** The inference process of the location criteria of activation rule 1.

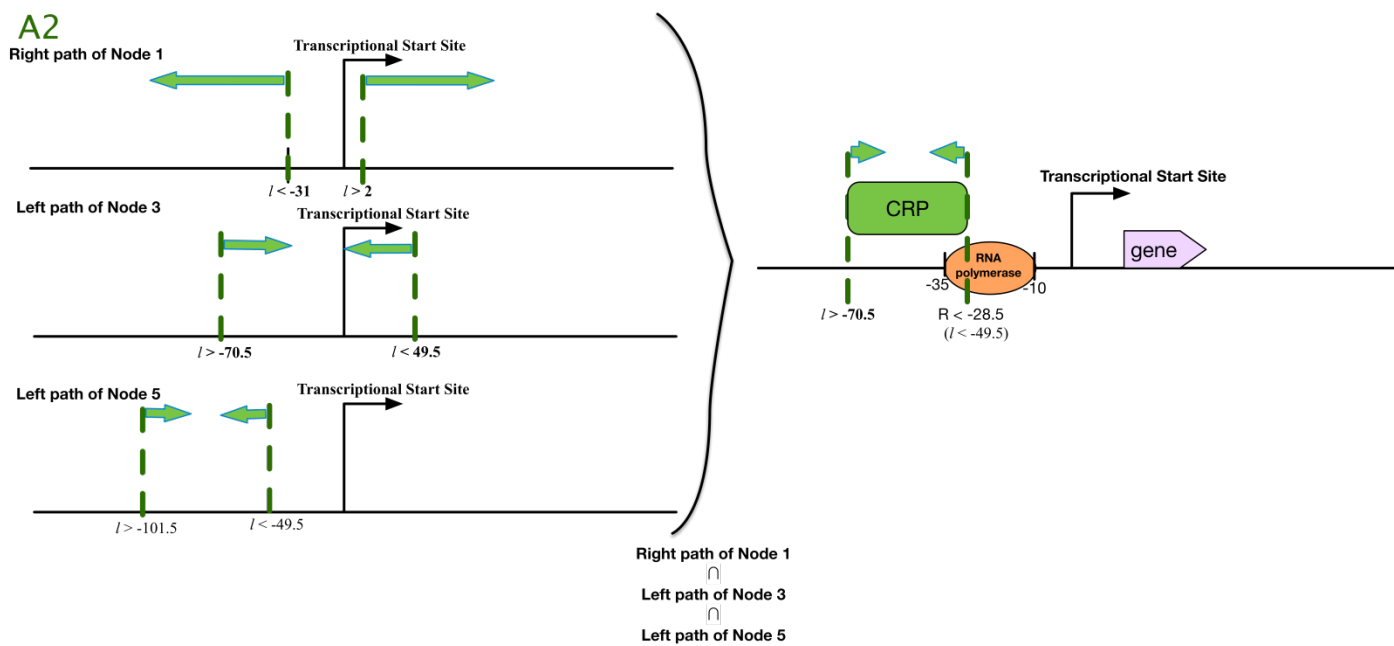

**Figure S3.** The inference process of the location criteria of activation rule 2.

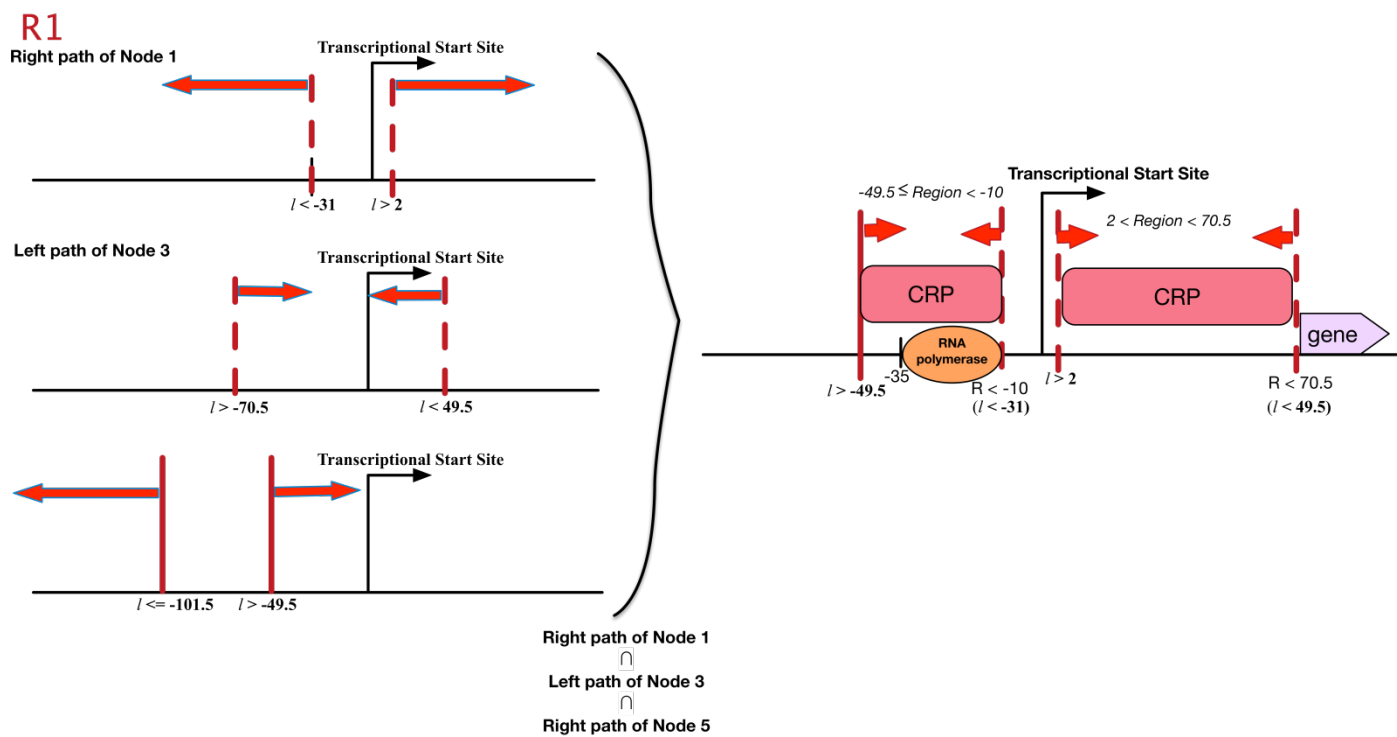

**Figure S4.** The inference process of the location criteria of repression rule 1.

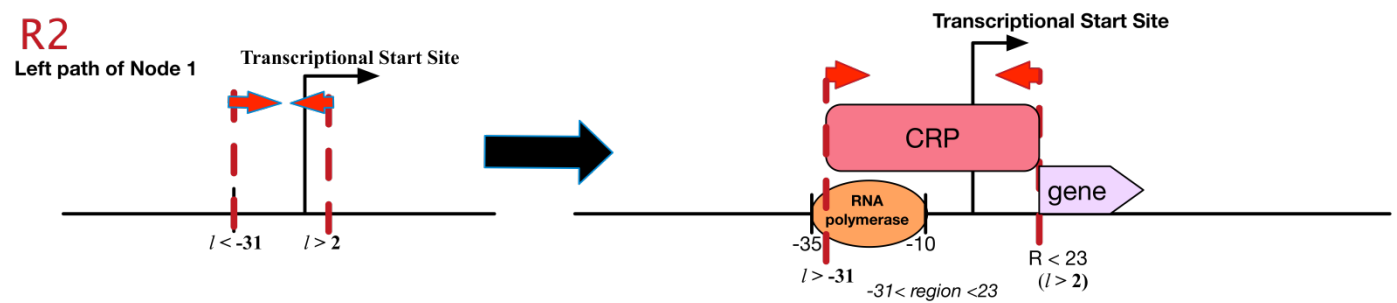

**Figure S5.** The inference process of the location criteria of repression rule 2.

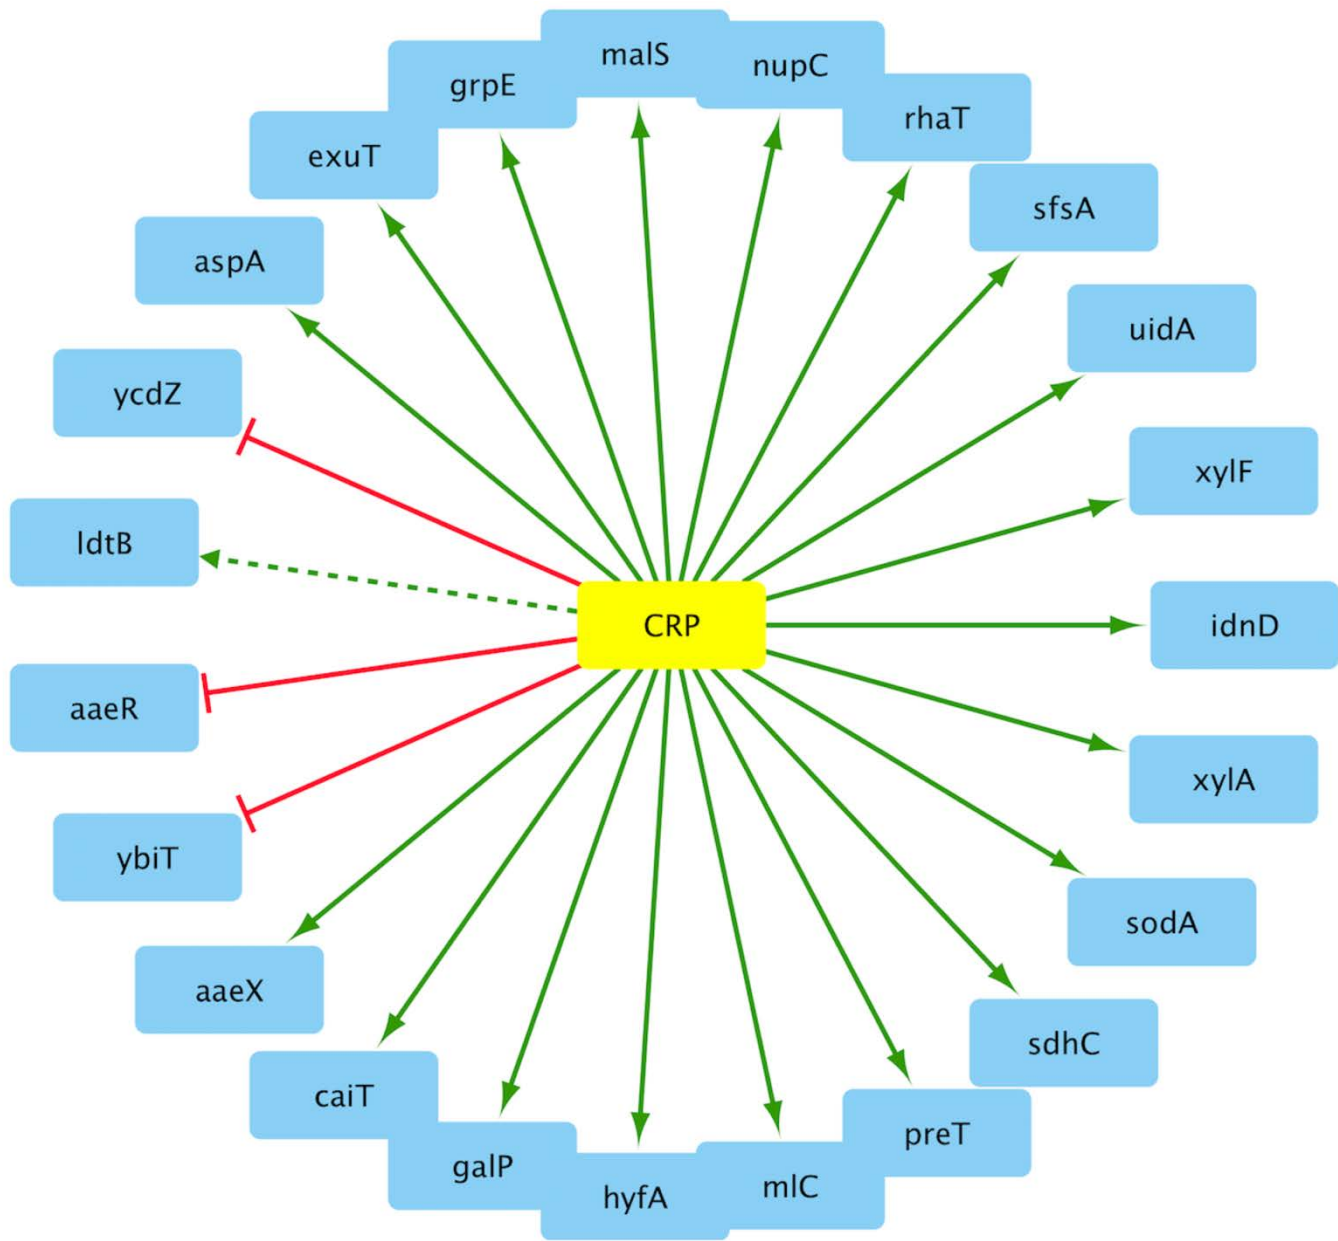

**Figure S6.** The CRP-regulated interactions where the regulatory roles were predicted by PredCRP.



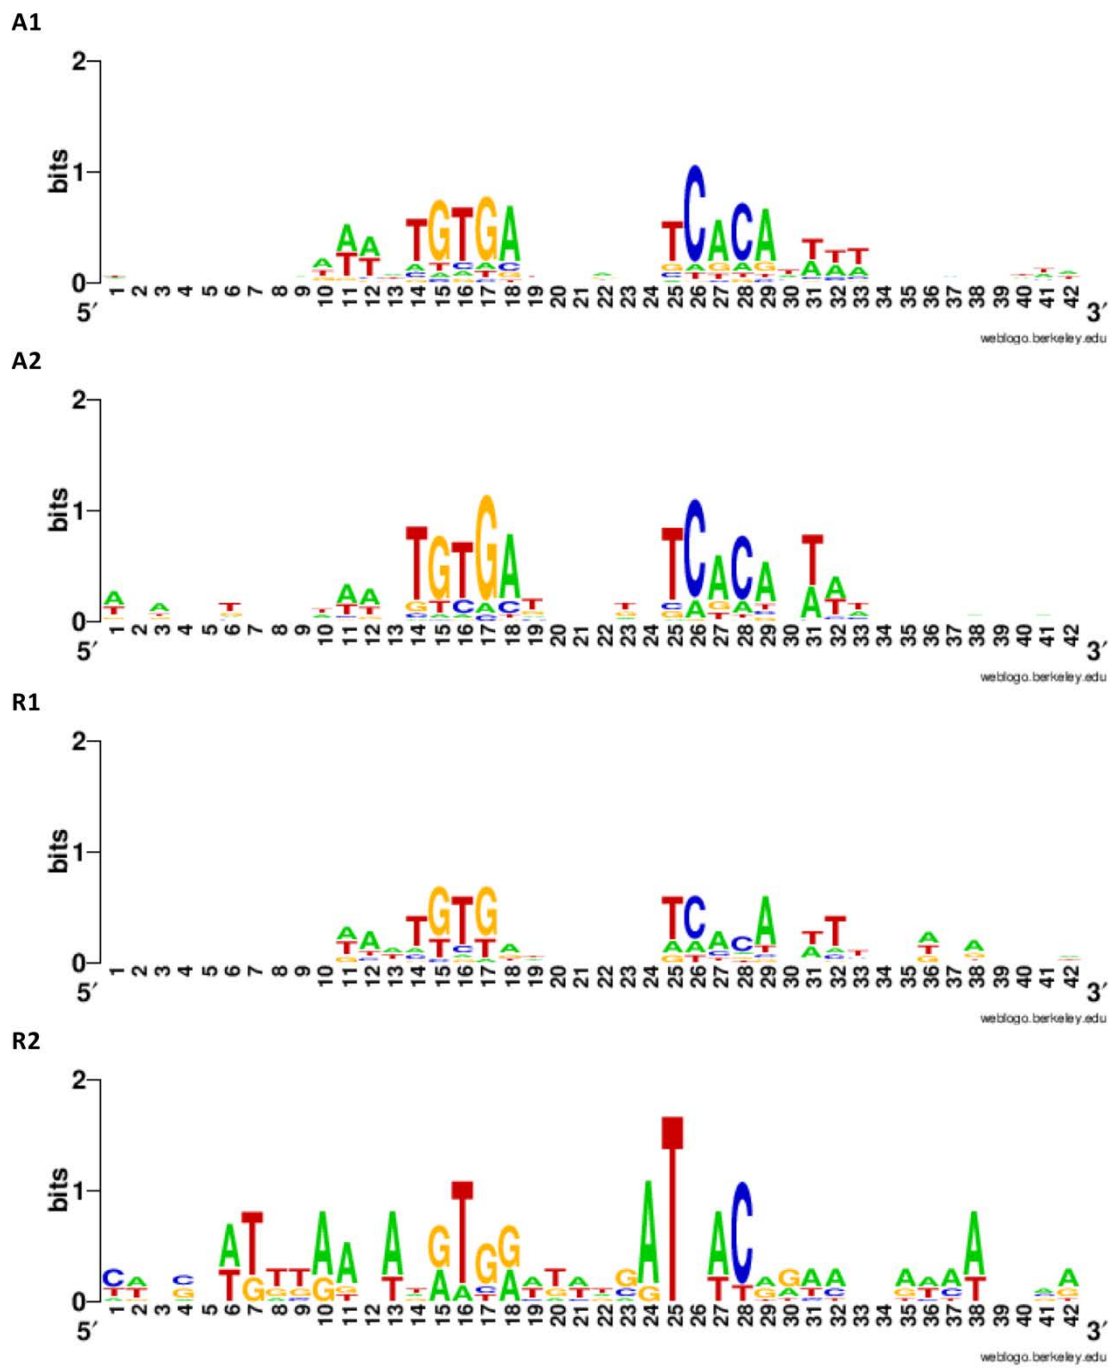

Figure S7. Sequence logo of each rule obtained from WebLogo

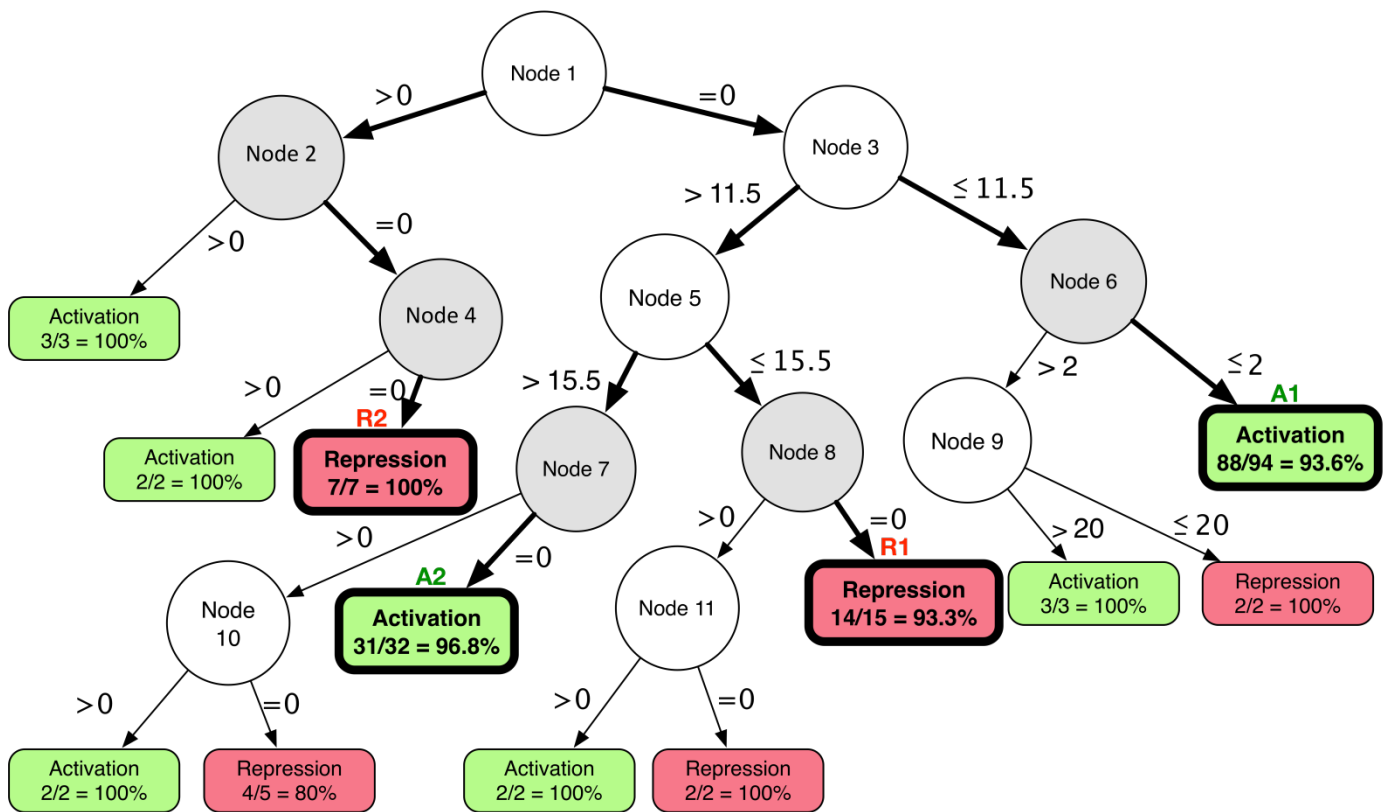

**Figure S8.** The nodes of the decision tree are numbered in both top-to-down and left-to-right manners. The gray nodes are related to informative motifs. On the other hand, the white ones are related to locations of CRP-binding sites.

## References

- 1 Savery, N. J. et al. Transcription activation at Class II CRP-dependent promoters: identification of determinants in the C-terminal domain of the RNA polymerase alpha subunit. *The EMBO journal* **17**, 3439-3447; DOI:10.1093/emboj17.12.3439 (1998).
- 2 Zheng, D., Constantinidou, C., Hobman, J. L. & Minchin, S. D. Identification of the CRP regulon using in vitro and in vivo transcriptional profiling. *Nucleic Acids Res.* **32**, 5874-5893; DOI:10.1093/nar/gkh908 (2004).
- 3 Busby, S. & Ebright, R. H. Transcription activation by catabolite activator protein (CAP). *Journal of molecular biology* **293**, 199-213; DOI:10.1006/jmbi.1999.3161 (1999).
- 4 Chen, Y. P., Lin, H. H., Yang, C. D., Huang, S. H. & Tseng, C. P. Regulatory role of cAMP receptor protein over Escherichia coli fumarase genes. *J Microbiol.* **50**, 426-433; DOI:10.1007/s12275-012-1542-6 (2012).
- 5 Yang, C. D., Chen, Y. H., Huang, H. Y., Huang, H. D. & Tseng, C. P. CRP represses the CRISPR/Cas system in Escherichia coli: evidence that endogenous CRISPR spacers impede phage P1 replication. *Mol. Microbiol.* **92**, 1072-1091; DOI:10.1111/mmi.12614 (2014).
- 6 Keseler, I. M. et al. The EcoCyc database: reflecting new knowledge about Escherichia coli K-12. *Nucleic Acids Res.* **45**, D543-D550; DOI:10.1093/nar/gkw1003 (2017).
- 7 Huang, W. L., Tung, C. W., Liaw, C., Huang, H. L. & Ho, S. Y. Rule-Based Knowledge Acquisition Method for Promoter Prediction in Human and Drosophila Species. *Scientific World Journal* (2014).
- 8 van Hijum, S. A. F. T., Medema, M. H. & Kuipers, O. P. Mechanisms and Evolution of Control Logic in Prokaryotic Transcriptional Regulation. *Microbiology and Molecular Biology Reviews* **73**, 481 (2009).
- 9 Huang, W. L., Tung, C. W., Huang, H. L., Hwang, S. F. & Ho, S. Y. ProLoc: Prediction of protein subnuclear localization using SVM with automatic selection from physicochemical composition features. *Biosystems* **90**, 573-581 (2007).
- 10 Yang, J. Y., Zhou, Y., Yu, Z. G., Anh, V. & Zhou, L. Q. Human Pol II promoter recognition based on primary sequences and free energy of dinucleotides. *BMC Bioinformatics* **9** (2008).
- 11 Zhang, Z. D., Kochhar, S. & Grigorov, M. G. Descriptor-based protein remote homology identification. *Protein Science* **14**, 431-444 (2005).
- 12 Chang, C. C. & Lin, C. J. LIBSVM: A Library for Support Vector Machines. *ACM Transactions on Intelligent Systems and Technology* **2** (2011).
- 13 Kozera, B. & Rapacz, M. Reference genes in real-time PCR. *J Appl. Genet.* **54**, 391-406; DOI:10.1007/s13353-013-0173-x (2013).
- 14 Raghavan, R., Sage, A. & Ochman, H. Genome-Wide Identification of Transcription Start Sites Yields a Novel Thermosensing RNA and New Cyclic AMP Receptor Protein-Regulated Genes in Escherichia coli. *Journal of Bacteriology* **193**, 2871-2874; DOI:10.1128/jb.00398-11 (2011).
- 15 Zheng, D. L., Constantinidou, C., Hobman, J. L. & Minchin, S. D. Identification of the CRP regulon using in vitro and in vivo transcriptional profiling. *Nucleic Acids Res.* **32**, 5874-5893; DOI:10.1093/nar/gkh908 (2004).
- 16 Sernova, N. V. & Gelfand, M. S. Comparative genomics of CytR, an unusual member of the LacI family of transcription factors. *PLoS One* **7**, e44194; DOI:10.1371/journal.pone.0044194 (2012).

- 17 Tsunedomi, R., Izu, H., Kawai, T. & Yamada, M. Dual control by regulators, GntH and GntR, of the GntII genes for gluconate metabolism in *Escherichia coli*. *J. Mol. Microbiol. Biotechnol.* **6**, 41-56; DOI:73407 (2003).
- 18 Golby, P., Kelly, D. J., Guest, J. R. & Andrews, S. C. Transcriptional regulation and organization of the *dcuA* and *dcuB* genes, encoding homologous anaerobic C4-dicarboxylate transporters in *Escherichia coli*. *J. Bacteriol.* **180**, 6586-6596 (1998).
- 19 Gosset, G., Zhang, Z., Nayyar, S., Cuevas, W. A. & Saier, M. H., Jr. Transcriptome analysis of Crp-dependent catabolite control of gene expression in *Escherichia coli*. *J. Bacteriol.* **186**, 3516-3524; DOI:10.1128/JB.186.11.3516-3524.2004 (2004).
- 20 Buchet, A., Eichler, K. & Mandrand-Berthelot, M. A. Regulation of the carnitine pathway in *Escherichia coli*: investigation of the *cai-fix* divergent promoter region. *J. Bacteriol.* **180**, 2599-2608 (1998).
- 21 Buchet, A., Nasser, W., Eichler, K. & Mandrand-Berthelot, M. A. Positive co-regulation of the *Escherichia coli* carnitine pathway *cai* and *fix* operons by CRP and the *CaiF* activator. *Mol. Microbiol.* **34**, 562-575 (1999).
- 22 Eichler, K., Bourgis, F., Buchet, A., Kleber, H. P. & Mandrand-Berthelot, M. A. Molecular characterization of the *cai* operon necessary for carnitine metabolism in *Escherichia coli*. *Mol. Microbiol.* **13**, 775-786 (1994).
- 23 Rodionov, D. A., Mironov, A. A., Rakhmaninova, A. B. & Gelfand, M. S. Transcriptional regulation of transport and utilization systems for hexuronides, hexuronates and hexonates in gamma purple bacteria. *Mol. Microbiol.* **38**, 673-683 (2000).
- 24 Weickert, M. J. & Adhya, S. The galactose regulon of *Escherichia coli*. *Mol. Microbiol.* **10**, 245-251 (1993).
- 25 Self, W. T., Hasona, A. & Shanmugam, K. T. Expression and regulation of a silent operon, *hyf*, coding for hydrogenase 4 isoenzyme in *Escherichia coli*. *J. Bacteriol.* **186**, 580-587 (2004).
- 26 Schneider, E., Freundlieb, S., Tapio, S. & Boos, W. Molecular characterization of the MalT-dependent periplasmic alpha-amylase of *Escherichia coli* encoded by *malS*. *J. Biol. Chem.* **267**, 5148-5154 (1992).
- 27 Otsuka, J., Watanabe, H. & Mori, K. T. Evolution of transcriptional regulation system through promiscuous coupling of regulatory proteins with operons; suggestion from protein sequence similarities in *Escherichia coli*. *J. Theor. Biol.* **178**, 183-204 (1996).
- 28 Shin, D., Lim, S., Seok, Y. J. & Ryu, S. Heat shock RNA polymerase (E sigma(32)) is involved in the transcription of *mlc* and crucial for induction of the Mlc regulon by glucose in *Escherichia coli*. *J. Biol. Chem.* **276**, 25871-25875; DOI:10.1074/jbc.M101757200 (2001).
- 29 Craig, J. E., Zhang, Y. & Gallagher, M. P. Cloning of the *nupC* gene of *Escherichia coli* encoding a nucleoside transport system, and identification of an adjacent insertion element, IS 186. *Mol. Microbiol.* **11**, 1159-1168 (1994).
- 30 Valentin-Hansen, P. et al. Design of cAMP-CRP-activated promoters in *Escherichia coli*. *Mol. Microbiol.* **5**, 433-437 (1991).
- 31 Mihara, H., Hidese, R., Yamane, M., Kurihara, T. & Esaki, N. The *iscS* gene deficiency affects the expression of pyrimidine metabolism genes. *Biochem. Biophys. Res. Commun.* **372**, 407-411; DOI:10.1016/j.bbrc.2008.05.019 (2008).
- 32 Via, P., Badia, J., Baldoma, L., Obradors, N. & Aguilar, J. Transcriptional regulation of the *Escherichia coli* *rhaT* gene. *Microbiology* **142** ( Pt 7), 1833-1840; DOI:10.1099/13500872-142-7-1833 (1996).
- 33 Zhang, Z. et al. Functional interactions between the carbon and iron utilization regulators, Crp and Fur, in *Escherichia coli*. *J. Bacteriol.* **187**, 980-990; DOI:10.1128/JB.187.3.980-990.2005 (2005).

- 34 Kawamukai, M. et al. Nucleotide sequence and characterization of the *sfs1* gene: *sfs1* is involved in CRP-dependent *mal* gene expression in *Escherichia coli*. *J. Bacteriol.* **173**, 2644-2648 (1991).
- 35 Blanco, C., Mata-Gilsinger, M. & Ritzenthaler, P. The use of gene fusions to study the expression of *uidR*, a negative regulatory gene of *Escherichia coli* K-12. *Gene* **36**, 159-167 (1985).
- 36 Song, S. & Park, C. Organization and regulation of the D-xylose operons in *Escherichia coli* K-12: XylR acts as a transcriptional activator. *J. Bacteriol.* **179**, 7025-7032 (1997).
